# Supplementary material for: Development of a High-Quality/Yield Long-Read Sequencing-Adaptable DNA Extraction Method for Crop Seeds
Source: MDPI journal article supplement (doi:10.3390/plants12162971), 2023-08-17

**Table S1.** Oxford Nanopore statistics for sequenced samples

|                                                               | CTA<br>B1 <sup>*1</sup> | CTAB2<br><sup>*1</sup> | IMP<br>Boom1 <sup>*1</sup> | IMP<br>Boom 2 <sup>*1</sup> | IMP<br>Boom 3 | IMP<br>Boom 4 | kit        |
|---------------------------------------------------------------|-------------------------|------------------------|----------------------------|-----------------------------|---------------|---------------|------------|
| Input DNA (ng) <sup>*2</sup>                                  | 1080                    | 1000                   | 999                        | 1089                        | 500           | 500           | 500        |
| DNA concentration after End-<br>prep <sup>*3</sup> (ng/μL)    | 8.04                    | 9.32                   | 13.60                      | 16.10                       | 10.40         | 39.40         | 26.4<br>0  |
| Library concentration <sup>*4</sup> (ng/μL)                   | 0.60                    | 1.54                   | 33.60                      | 31.20                       | 22.60         | 17.80         | 9.64       |
| Total run time (h)                                            | 24                      | 24                     | 19.5                       | 19.5                        | 24            | 24            | 24         |
| Number of pores (QC) <sup>*5</sup>                            | 41                      | 45                     | 76                         | 45                          | 81            | 54            | 86         |
| Number of pores immediately<br>after sequencing <sup>*6</sup> | 34                      | 40                     | 67                         | 46                          | 76            | 54            | 70         |
| Read length N <sub>50</sub> (kbp)                             | 0.95                    | 1.11                   | 14.96                      | 14.36                       | 18.11         | 20.96         | 12.4<br>0  |
| Mean read length (bp)                                         | 686                     | 581                    | 2,904                      | 2,796                       | 3,273         | 3,242         | 4,00<br>7  |
| Median read length (bp)                                       | 356                     | 271                    | 709                        | 618                         | 719           | 664           | 1,18<br>0  |
| Total reads (k reads)                                         | 14.85                   | 96.9                   | 94.13                      | 38.79                       | 85.07         | 66.52         | 165.<br>81 |
| Sequencing yield (Mbp)                                        | 9.68                    | 73.76                  | 325.04                     | 116.60                      | 300.09        | 226.60        | 732.<br>09 |

For both the CTAB and IMP Boom methods, two long-read sequencing runs were performed, but only one for kit due to low DNA yield. To obtain sufficient DNA for a DNA library in the kit method, three DNA tubes were pooled together. The DNA libraries of IMP Boom3, 4, and kit were constructed using intact DNA.

<sup>\*1</sup> These libraries were constructed using DNA fragmented by g-TUBEs.

<sup>\*2</sup> The amount of genomic DNA for library construction.

<sup>\*3</sup> The concentration of DNA eluted in nuclease-free water after end-pred reaction.

<sup>\*4</sup> The concentration of the library used for sequencing.

<sup>\*5</sup> The number of pores obtained during the pre-sequencing quality control (QC) process.

<sup>\*6</sup> The number of pores immediately after the start of sequencing.

**Table S2.** Nucleotide sequences of primers used in this study

| Primers                                                                    | Forward                       | Reverse                         |
|----------------------------------------------------------------------------|-------------------------------|---------------------------------|
| For quantification of nuclear, chloroplast, and mitochondrial DNA via qPCR |                               |                                 |
| Nuclear DNA<br>(GmTubline)                                                 | GAGAAGAGTATCCGGATAGG          | GAGCTTGAGTGTTCCGAAAC            |
| Plastid DNA                                                                | CTTCTACAACCCCTGATATTCAA<br>AG | ACATACATAATAAGATGTGAATG<br>ATAC |
| Mitochondrial DNA                                                          | AAAGCTAAAAGTAGGCTCGCTA<br>TTG | TAAGTCAAGTACTACACGAGCGA<br>AG   |
| For genotyping based on SSR markers                                        |                               |                                 |
| Satt181                                                                    | TGGCTAGCAGATTGACA             | GGAGCATAGCTGTTAGGA              |
| Satt373                                                                    | TCCGCGAGATAAATTCGTAAAA<br>T   | GGCCAGATACCCAAGTTGTACTT<br>GT   |
| For PCR of target genes                                                    |                               |                                 |
| <i>GmActin</i>                                                             | ACCTGTACGGTAACATTGTCCTT<br>TC | GAATCTTTGATTAGAGAGCTTGTG<br>C   |
| <i>GmSACPD-B</i>                                                           | ACACTTCATTTCAAGAGAGGGC<br>AAC | TCTCACATGTTAACGTAGCGTATA<br>C   |
| <i>GmSACPD-A</i>                                                           | ACACTTCATTTCAAGAGAGGGC<br>AAC | AAATAACAAGCCATATCCCAGCA<br>AG   |
| <i>GmSACPD-C</i>                                                           | ACACGTCATTCCAAGAGCGAGC<br>AAC | CGTACTCAAAATGCCACCTACAA<br>AC   |

**Table S3.** Costs of reagents and kits used in this study

| Reagents or kit                         | Company        | Volume    | No.      | Cost<br>(Japanese<br>Yen) | Cost<br>(US<br>dollar) |
|-----------------------------------------|----------------|-----------|----------|---------------------------|------------------------|
| Reagents purchased                      |                |           |          |                           |                        |
| Guanidine thiocyanate                   | Nakarai Tesque | 1 kg      | 17345-51 | ¥31,100                   |                        |
| PVPP (Polyvinylpolypyrrolidone)         | Sigma–Aldrich  | 1 kg      | 77627    | ¥78,200                   |                        |
| Diatomaceous earth                      | Sigma–Aldrich  | 1 kg      | D3877    | ¥14,800                   |                        |
| Triton X-100                            | Nakarai Tesque | 500 mL    | 12969-25 | ¥2,650                    |                        |
| Tween-20                                | Nakarai Tesque | 500 mL    | 28353-85 | ¥3,350                    |                        |
| Reagents created                        |                |           |          |                           |                        |
| Guanidine thiocyanate stock             | -              | 1 L       |          | ¥22,261                   |                        |
| Lysis buffer                            | -              | 1 L       |          | ¥3,715                    |                        |
| Binding buffer                          | -              | 480 mL    |          | ¥8,926                    |                        |
| Wash buffer                             | -              | 500 mL    |          | ¥5,565                    |                        |
| Per sample of optimized Boom method     |                |           |          |                           |                        |
| Lysis buffer                            | -              | 6 mL      |          | ¥22                       |                        |
| Binding buffer                          | -              | 10 mL     |          | ¥186                      |                        |
| Wash buffer                             | -              | 1.5 mL    |          | ¥56                       |                        |
| Total                                   |                |           |          | ¥264                      | US\$2.0                |
| DNeasy Plant Mini kit (50)              | Qiagen         | 50 times  | 69104    | ¥32,000                   |                        |
| Per sample                              |                |           |          | ¥640                      | US\$4.8                |
| Genomic DNA Extraction kit Mini (Plant) | RBC Bioscience | 100 times | YGP100   | ¥30,000                   |                        |
| Per sample                              |                |           |          | ¥300                      | US\$2.3                |

**Figure S1.** Comparison of read length frequencies of DNA extracted using the kit, IMP Boom, and CTAB methods. The read length N<sub>50</sub> values for each library are shown in the upper-right corner of the figure. Purple, blue, and black arrows indicate maximum read lengths for the Boom3, 4, CTAB1, 2, and kit methods, respectively.

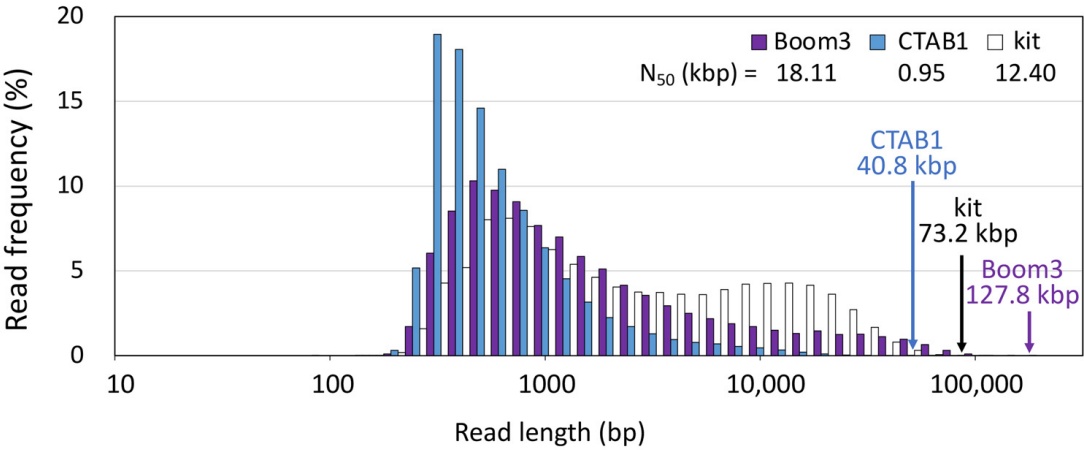

**Figure S2.** Versatility of DNA obtained using the IMP Boom method. (A) Electrophoresis of SSR markers on a 3% agarose gel. Genotyping for the Satt181 and Satt373 markers in the DNA extracted from RIL seeds of different genetic backgrounds. (B) Gene regions of GmActin, GmSACPD-B, GmSACPD-A, and GmSACPD-C were amplified using PCR from DNA extracted from Enrei seeds. SM is a size marker containing DNA lengths from 100 to 10,000 bp.

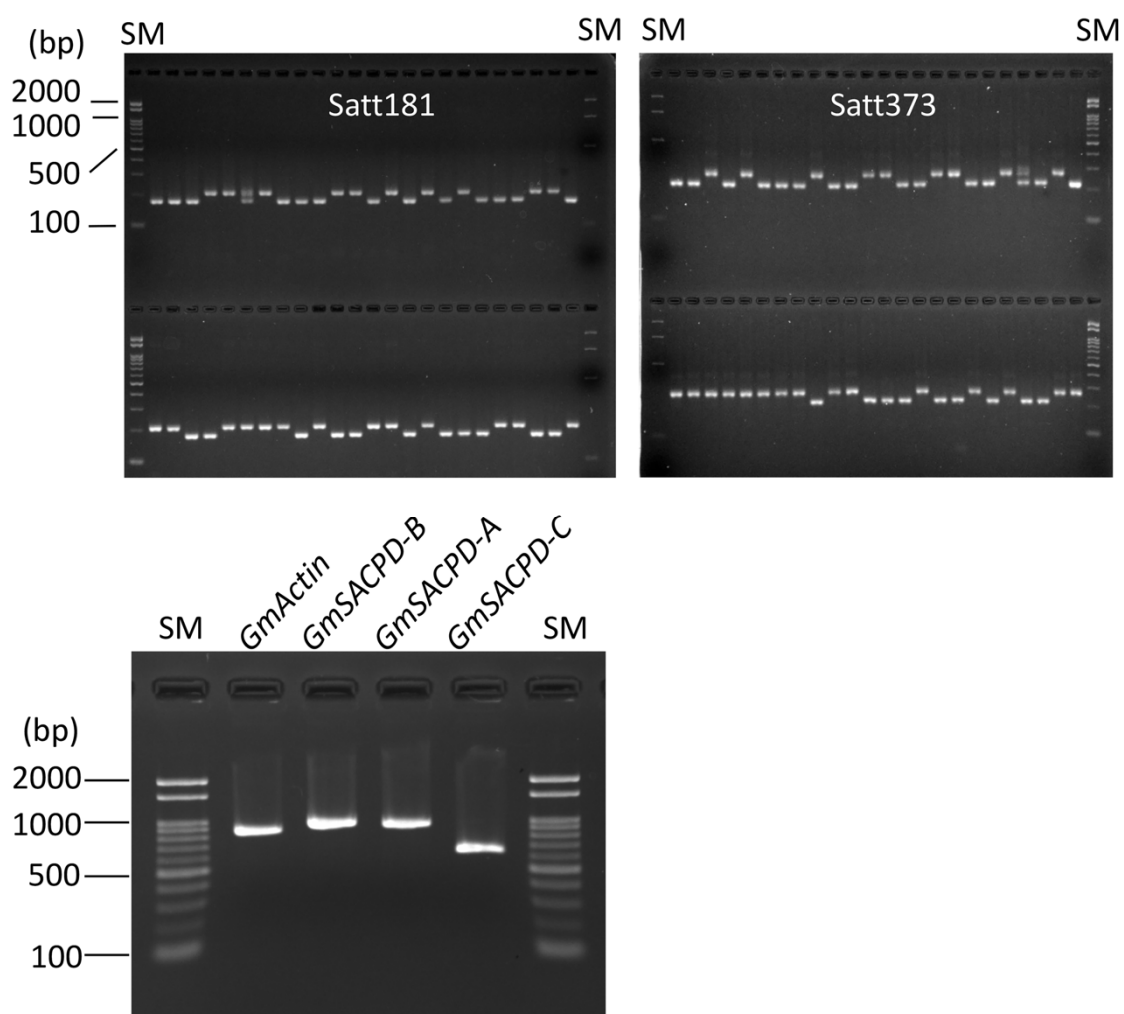

Supplement: s1 [file s1]
